# Supplementary material for: Alcohol Consumption and Its Association with Biochemical Indicators and Quality of Life Among Rural Adults in Northern Thailand
Source: Research Square preprint supplement (doi:10.21203/rs.3.rs-7958784/v1), 2025-11-13
Supplement: Supplementary file 1 [file 321866e4b0e0b157bde36f91.docx]

**Author(s) name(s) and institutional affiliations:**

Surangkana Chairinkam1, Wannita Sakulwattana1, Katekaew Seangpraw1, Parichat Ong-Artborirak2, Nestor Asiamah3, Sasivimol Bootsikeaw1, Prapaporn Tulwattanakul1, Nutthaphong Mated1, Manuchet Manotham1,*

1 School of Public Health, University of Phayao, 56000, Phayao, Thailand

2 Department of Research and Medical Innovation, Faculty of Medicine Vajira Hospital,

Navamindradhiraj University, 10300, Bangkok, Thailand

3 School of Health and Social Care, University of Essex, Colchester, United Kingdom

1- Surangkana Chairinkam

Affiliation: School of Public Health, University of Phayao, 56000, Phayao, Thailand

Email Address: [surangkana.ch@up.ac.th](mailto:surangkana.ch@up.ac.th)

ORCID: https://orcid.org/0009-0004-1804-6522

2- Wannita Sakulwattana

Affiliation: School of Public Health, University of Phayao, 56000, Phayao, Thailand

Email Address: [wannita.sa@up.ac.th](mailto:wannita.sa@up.ac.th)

ORCID: <https://orcid.org/0009-0006-7647-0043>

3- Katekaew Seangpraw

Affiliation: School of Public Health, University of Phayao, 56000, Phayao, Thailand

Email Address: [eungkaew@gmail.com](mailto:eungkaew@gmail.com)

ORCID: <https://orcid.org/0000-0002-7184-381X>

4- Parichat Ong-Artborirak

Affiliation: Department of Research and Medical Innovation, Faculty of Medicine Vajira Hospital, Navamindradhiraj University, 10300, Bangkok, Thailand

Email Address: [ong.artborirak@gmail.com](mailto:ong.artborirak@gmail.com)

ORCID: <https://orcid.org/0000-0003-0884-9466>

5- Nestor Asiamah

Affiliation: School of Health and Social Care, University of Essex, Colchester, United Kingdom

Email Address: [n.asiamah@essex.ac.uk](mailto:n.asiamah@essex.ac.uk)

ORCID: <https://orcid.org/0000-0002-1157-6430>

6- Sasivimol Bootsikeaw

Affiliation: School of Public Health, University of Phayao, 56000, Phayao, Thailand

Email Address: [sasivimol.bo@up.ac.th](mailto:sasivimol.bo@up.ac.th)

ORCID: <https://orcid.org/0000-0003-2730-1578>

7- Prapaporn Tulwattanakul

Affiliation: School of Public Health, University of Phayao, 56000, Phayao, Thailand

Email Address: [prapaporn.tu@up.ac.th](mailto:prapaporn.tu@up.ac.th)

ORCID: <https://orcid.org/0009-0002-7602-7958>

8- Nutthaphong Mated

Affiliation: School of Public Health, University of Phayao, 56000, Phayao, Thailand

Email Address: [nutthaphong.ma@up.ac.th](mailto:nutthaphong.ma@up.ac.th)

ORCID: <https://orcid.org/0000-0001-8958-2016>

9- Manuchet Manotham

Affiliation: School of Public Health, University of Phayao, 56000, Phayao, Thailand

Email Address: [manuchet.ma@up.ac.th](mailto:manuchet.ma@up.ac.th)

ORCID: <https://orcid.org/0009-0001-0980-019X>

**Correspondence:**

Manuchet Manotham

Affiliation: School of Public Health, University of Phayao, 56000, Phayao, Thailand

Email Address: manuchet.ma@up.ac.th

ORCID: <https://orcid.org/0009-0001-0980-019X>

Mobile phone: (66) 084 174 4894
